# Supplementary material
Source: publisher figshare collection journal article supplement (https://karger.figshare.com/articles/dataset/_/5620756)
Supplement: Supplementary file 1 [file 1]

**Table S2.** Mean (SD) serum TNF- $\alpha$  and IL-1 $\beta$  levels by their genotypes.

| Polymorphism  | Genotype   | Number | Serum levels<br>Mean (SD) | p-value*     |
|---------------|------------|--------|---------------------------|--------------|
| TNF- $\alpha$ | total      | 286    | 65.8 (40.1)               |              |
| -850C/T       | <i>C/C</i> | 199    | 61.3 (38.6)               |              |
|               | <i>C/T</i> | 73     | 75.5 (40.7)               | <b>0.016</b> |
|               | <i>T/T</i> | 14     | 78.7 (48.4)               |              |
| -308G/A       | <i>G/G</i> | 237    | 64.3 (38.8)               |              |
|               | <i>G/A</i> | 49     | 73.0 (45.9)               | 0.168        |
| IL-1 $\beta$  | total      | 286    | 2.8 (1.5)                 |              |
| -511C/T       | <i>C/C</i> | 106    | 2.6 (1.7)                 |              |
|               | <i>C/T</i> | 148    | 3.0 (1.4)                 | <b>0.043</b> |
|               | <i>T/T</i> | 32     | 2.9 (1.3)                 |              |
| +3953C/T      | <i>C/C</i> | 259    | 2.8 (1.5)                 |              |
|               | <i>C/T</i> | 27     | 3.2 (1.7)                 | 0.179        |

Notes: \*p-value using ANOVA. TNF = tumor necrosis factor; IL = interleukin.
