# Supplementary material
Source: publisher figshare collection journal article supplement (https://karger.figshare.com/articles/dataset/_/5620756)
Supplement: Supplementary file 2 [file 1]

Table S1. Baseline characteristics by modified Rankin Scale (mRS) grades at admission.

|                                                                | All patients<br>(N=286) | mRS ≤ 1<br>(N=98) | mRS ≥ 2<br>(N=188) | p-<br>value*     |
|----------------------------------------------------------------|-------------------------|-------------------|--------------------|------------------|
| Age, mean (SD) year                                            | 64.5 (9.5)              | 63.1 (9.4)        | 65.2 (9.5)         | 0.087            |
| Gender, N (%) men                                              | 169 (59.1)              | 63 (64.3)         | 106 (56.4)         | 0.197            |
| Education, mean (SD) year                                      | 8.5 (5.0)               | 8.9 (4.9)         | 8.3 (5.1)          | 0.319            |
| Previous stroke, N (%)                                         | 28 (9.8)                | 8 (8.2)           | 20 (10.6)          | 0.504            |
| Heart disease, N (%)                                           | 27 (9.4)                | 13 (13.3)         | 14 (7.4)           | 0.110            |
| Hypertension, N (%)                                            | 141 (49.3)              | 44 (44.9)         | 97 (51.6)          | 0.282            |
| Diabetes, N (%)                                                | 84 (29.4)               | 30 (30.6)         | 54 (28.7)          | 0.739            |
| Stroke hemisphere, N (%)                                       |                         |                   |                    |                  |
| Left                                                           | 130 (45.5)              | 49 (50.0)         | 81 (43.1)          | 0.495            |
| Right                                                          | 141 (49.3)              | 45 (45.9)         | 94 (51.1)          |                  |
| Bilateral                                                      | 15 (5.2)                | 4 (4.1)           | 11 (5.9)           |                  |
| Systolic blood pressure, mean<br>(SD) mmHg                     | 138.5 (21.0)            | 138.0 (25.6)      | 138.8 (18.2)       | 0.801            |
| Diastolic blood pressure, mean<br>(SD) mmHg                    | 84.2 (15.1)             | 82.2 (16.2)       | 85.2 (14.5)        | 0.111            |
| Glucose, mean (SD) mg/dL                                       | 148.4 (69.2)            | 150.3 (77.4)      | 147.4 (64.6)       | 0.736            |
| Total cholesterol, mean (SD)<br>mg/dL                          | 188.7 (38.9)            | 191.2 (38.5)      | 187.4 (39.2)       | 0.444            |
| National Institutes of Health<br>Stroke Scale, mean (SD) score | 3.4 (3.2)               | 1.1 (0.8)         | 4.6 (3.3)          | <b>&lt;0.001</b> |
| Barthel Index, mean (SD) score                                 | 80.1 (23.0)             | 97.6 (5.8)        | 71.0 (23.3)        | <b>&lt;0.001</b> |
| Hamilton Depression Rating<br>Scale at 2 week, mean (SD) score | 7.9 (6.3)               | 6.9 (6.1)         | 8.4 (6.3)          | <b>0.047</b>     |

\* p-value using t-tests or  $\chi^2$  tests, as appropriate. mRS= modified Rankin Scale
